# Supplementary material for: Biomineralization of amorphous Fe-, Mn- and Si-rich mineral phases by cyanobacteria under oxic and alkaline conditions
Source: Copernicus journal article supplement (doi:10.5194/bg-20-4183-2023), 2023-10-12
Supplement: Supplementary file 1 [file bg-20-4183-2023-supplement.zip]

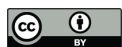

*Supplement of*

**Biomining of amorphous Fe-, Mn- and Si-rich mineral phases by cyanobacteria under oxic and alkaline conditions**

**Karim Benzerara et al.**

*Correspondence to:* Karim Benzerara ([karim.benzerara@sorbonne-universite.fr](mailto:karim.benzerara@sorbonne-universite.fr))

- [bg-20-4183-2023-supplement-title-page.pdf](#)
- [supplementary](#)
  - [Table SI-1 EDX quanti.xlsx](#)
  - [Table SI-2 cyanocatena\\_abundance.xlsx](#)
  - [bg-2023-90-supplement-version3.pdf](#)

The copyright of individual parts of the supplement might differ from the article licence.
